# Supplementary material for: Diurnal temperature range as a key predictor of plants’ elevation ranges globally
Source: PubMed Central journal article supplement (PMC10689480; doi:10.1038/s41467-023-43477-8), 2023-11-30
Supplement: 41467_2023_43477_MOESM3_ESM.pdf [file 41467_2023_43477_MOESM3_ESM.pdf]

## **Description of Additional Supplementary Files**

**Supplementary Data 1:** Elevation range and climate data to reproduce all the analyses.

**Supplementary Data 2:** Climate data along elevation.
